# Supplementary material
Source: HighWire-hosted journal article supplement (https://bmjopen.bmj.com/content/12/1/e054492)
Supplement: inline-supplementary-material-1 [file inline-supplementary-material-1.pdf]

*Interventions providing LTC around the world***Appendix****Box 1. PubMed Search terms**

```

((((((((((((("long-term care"[MeSH Terms] OR ("long term"[All Fields] AND "care"[All Fields])) OR "long term care"[All Fields]) OR ("long"[All Fields] AND "term"[All Fields]) AND "care"[All Fields])) OR "long term care"[All Fields]) OR ("health services for the aged"[MeSH Terms] OR ("health"[All Fields] AND "services"[All Fields]) AND "aged"[All Fields])) OR "health services for the aged"[All Fields])) OR (((((((("social work"[MeSH Terms] OR ("social"[All Fields] AND "work"[All Fields])) OR "social work"[All Fields]) OR ("social"[All Fields] AND "services"[All Fields])) OR "social services"[All Fields]) OR "social welfare"[MeSH Terms]) OR ("social"[All Fields] AND "welfare"[All Fields])) OR "social welfare"[All Fields]) OR ("social"[All Fields] AND "services"[All Fields])) OR (((((((((((("social"[All Fields] OR "socialisation"[All Fields]) OR "socialization"[MeSH Terms]) OR "socialization"[All Fields]) OR "socialise"[All Fields]) OR "socialised"[All Fields]) OR "socialising"[All Fields]) OR "socialities"[All Fields]) OR "sociality"[All Fields]) OR "socializations"[All Fields]) OR "socialize"[All Fields]) OR "socialized"[All Fields]) OR "socializers"[All Fields]) OR "socializes"[All Fields]) OR "socializing"[All Fields]) OR "socially"[All Fields]) OR "socials"[All Fields]) AND "care"[All Fields])) AND (((((((("intervention s"[All Fields] OR "interventions"[All Fields]) OR "interventive"[All Fields]) OR "methods"[MeSH Terms]) OR "methods"[All Fields]) OR "intervention"[All Fields]) OR "interventional"[All Fields])) OR (((("service"[All Fields] OR "service s"[All Fields]) OR "serviced"[All Fields]) OR "services"[All Fields]) OR "services s"[All Fields]) OR "servicing"[All Fields])) AND (((("long-term care"[MeSH Terms] OR ("long term"[All Fields] AND "care"[All Fields])) OR "long term care"[All Fields]) OR ("long"[All Fields] AND "term"[All Fields]) AND "care"[All Fields])) OR "long term care"[All Fields]) AND (("facilities"[All Fields] OR "facility"[All Fields]) OR "facility s"[All Fields])) OR (("assisted living facilities"[MeSH Terms] OR ("assisted"[All Fields] AND "living"[All Fields]) AND "facilities"[All Fields])) OR "assisted living facilities"[All Fields])) OR (("nursing homes"[MeSH Terms] OR ("nursing"[All Fields] AND "homes"[All Fields])) OR "nursing homes"[All Fields])) OR (("homes for the aged"[MeSH Terms] OR ("homes"[All Fields] AND "aged"[All Fields])) OR "homes for the aged"[All Fields])) OR (((((((("nursing"[MeSH Subheading] OR "nursing"[All Fields]) OR ("home"[All Fields] AND "care"[All Fields])) OR "home care"[All Fields]) OR "home care services"[MeSH Terms]) OR ("home"[All Fields] AND "care"[All Fields]) AND "services"[All Fields])) OR "home care services"[All Fields]) OR ("home"[All Fields] AND "care"[All Fields])) OR (((("community health services"[MeSH Terms] OR ("community"[All Fields] AND "health"[All Fields]) AND "services"[All Fields])) OR "community health services"[All Fields])) OR (((("caregiver s"[All Fields] OR "caregivers"[MeSH Terms]) OR "caregivers"[All Fields]) OR "caregiver"[All Fields]) OR "caregiving"[All Fields])) AND (((("aged"[MeSH Terms] OR "aged"[All Fields]) OR "older"[All Fields] AND "adult"[All Fields])) OR "older adult"[All Fields])) AND (("frail elderly"[MeSH Terms] OR ("frail"[All Fields] AND "elderly"[All Fields])) OR "frail elderly"[All Fields])

```

**Box 2. CINAHL Search terms**

```

( long-term care or nursing home or residential care or assisted living ) AND ( services or interventions ) AND ( older adults or elderly or seniors or geriatrics ) AND ( social services )

```

**Box 3. Cochrane Search terms**

```

Long Term Care AND Long Term Care Facilities AND Services or Interventions OR social services AND Older Adult

```

**Box 4. Google Advanced Search terms**

```

Long Term Care AND Long Term Care Facilities AND Services or Interventions OR social services AND Older Adult

```

*Interventions providing LTC around the world***Table 8. Country representativeness regarding study publication per income level according to the World Bank <sup>a</sup>**

| Country                    | No. of studies | % of identified studies | Income level             |
|----------------------------|----------------|-------------------------|--------------------------|
| United States              | 56             | 18.4                    | HIC                      |
| China and Taiwan           | 39             | 12.8                    | HIC and UMC <sup>c</sup> |
| Netherlands                | 19             | 6.2                     | HIC                      |
| Japan                      | 18             | 5.9                     | HIC                      |
| Australia                  | 15             | 4.9                     | HIC                      |
| Sweden                     | 14             | 4.6                     | HIC                      |
| United Kingdom             | 14             | 4.6                     | HIC                      |
| Canada                     | 11             | 3.6                     | HIC                      |
| Spain                      | 10             | 3.3                     | HIC                      |
| Finland                    | 7              | 2.3                     | HIC                      |
| France                     | 6              | 2.0                     | HIC                      |
| Italy                      | 6              | 2.0                     | HIC                      |
| Belgium                    | 4              | 1.3                     | HIC                      |
| Germany                    | 4              | 1.3                     | HIC                      |
| Norway                     | 4              | 1.3                     | HIC                      |
| Mix countries <sup>b</sup> | 4              | 1.3                     | HIC                      |
| Austria                    | 3              | 1.0                     | HIC                      |
| Korea                      | 3              | 1.0                     | HIC                      |
| Switzerland                | 3              | 1.0                     | HIC                      |
| Hungary                    | 2              | 0.7                     | HIC                      |
| Ireland                    | 2              | 0.7                     | HIC                      |
| Singapore                  | 2              | 0.7                     | HIC                      |
| New Zealand                | 2              | 0.7                     | HIC                      |
| Croatia                    | 1              | 0.3                     | HIC                      |
| Denmark                    | 1              | 0.3                     | HIC                      |
| Israel                     | 1              | 0.3                     | HIC                      |
| Portugal                   | 1              | 0.3                     | HIC                      |
| Brazil                     | 4              | 1.3                     | UMC <sup>c</sup>         |
| Argentina                  | 2              | 0.7                     | UMC <sup>c</sup>         |
| Colombia                   | 1              | 0.3                     | UMC <sup>c</sup>         |
| Mexico                     | 1              | 0.3                     | UMC <sup>c</sup>         |
| Turkey                     | 1              | 0.3                     | UMC <sup>c</sup>         |
| Not specified ****         | 44             | 14.5                    |                          |
| Total                      | 305            | 100.0                   |                          |

<sup>a</sup> According to the new categorization from 1<sup>st</sup> July 2020<sup>10</sup>; <sup>b</sup> Studies conducted in several countries simultaneously; <sup>c</sup> Upper Middle Country.

*Interventions providing LTC around the world*
